# Supplementary material for: GTPase cross talk regulates TRAPPII activation of Rab11 homologues during vesicle biogenesis
Source: PubMed Central journal article supplement — J Cell Biol. 2016 Nov 21;215(4):499–513. doi: 10.1083/jcb.201608123 (PMC5119942; doi:10.1083/jcb.201608123), 2016-11-21
Supplement: JCB_201608123_sm.pdf [file JCB_201608123_sm.pdf]

Thomas and Fromme, <https://doi.org/10.1083/jcb.201608123>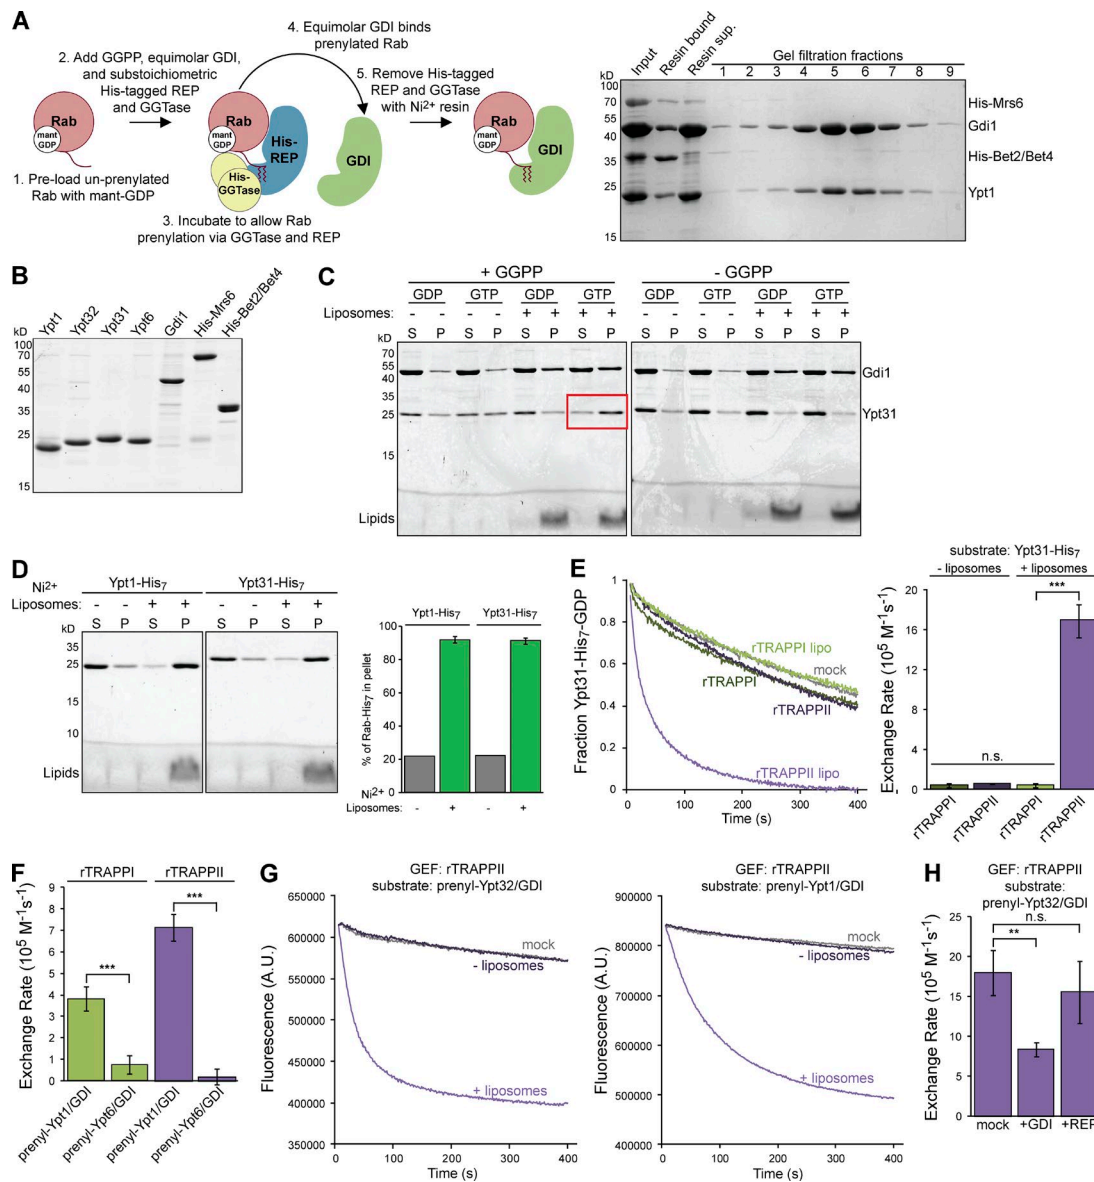

Figure S1. **Generation of prenylated-Rab/GDI complexes and GEF activity assay controls.** (A, left) Schematic depicting the workflow used to generate prenylated-Rab/GDI complexes used as substrates in GEF activity assays. Consistent with proposed mechanisms of Rab prenylation (Goody et al., 2005), we found that the REP Mrs6 was required for geranylgeranylation of the Rab C-terminal cysteines. We therefore used substoichiometric concentrations of the REP and the geranylgeranyl transferase (GGTase) Bet2/Bet4 to generate the desired prenylated-Rab/GDI complexes. (right) Example of samples taken during a Ypt1 prenylation reaction. Gel-filtration fractions 4, 5, and 6 with stoichiometric prenylated-Ypt1/GDI complexes were pooled and used as substrates in GEF assays. (B) 0.5  $\mu$ g of each reagent used to generate prenylated-Rab/GDI complexes were run on a 15% SDS-PAGE gel and stained for total protein. (C) Liposome pelleting assays with Ypt31/GDI complexes prepared with and without GGPP. Ypt31/GDI complexes were assayed for membrane binding after exchange with GDP or GTP. Rabs from complexes prepared with GGPP shed their GDI and bind membranes in a nucleotide-dependent manner (red box). (D) Liposome pelleting assays with similar conditions as used in GEF assays showing that >90% of His-tagged Rabs are membrane-anchored in GEF assays. Error bars represent 95% CIs of  $n = 2$  independent experiments. (E, left) Normalized representative traces showing activation of His-tagged Ypt31 by rTRAPPI or II in the presence or absence of TGN liposomes (lipo). "mock" is a control lacking TRAPP for intrinsic exchange of His-tagged Rabs. (right) Rates of TRAPP-mediated Ypt31-His<sub>7</sub> activation determined from the traces at left. Error bars represent 95% CIs for  $n \geq 2$  reactions (without liposomes) or  $n \geq 3$  reactions (with liposomes). (F) Rates of prenylated-Ypt1/GDI and prenylated-Ypt6/GDI activation by rTRAPPI and II in the presence of TGN liposomes. Error bars represent 95% CIs for  $n = 3$  reactions. (G) Representative fluorescence traces showing a lack of activation of prenylated Rabs by rTRAPPII in the absence of liposome membranes. Traces are representative of  $n > 5$  independent experiments. (H) Rates of prenylated-Ypt32/GDI activation by rTRAPPII on TGN liposomes in the absence (mock) or presence of a fivefold molar excess of GDI or REP. Error bars represent 95% CIs for  $n \geq 3$  reactions. A.U., arbitrary units; P, membrane pellet; S, supernatant. n.s., not significant; \*\*,  $P < 0.01$ ; \*\*\*,  $P < 0.001$ .

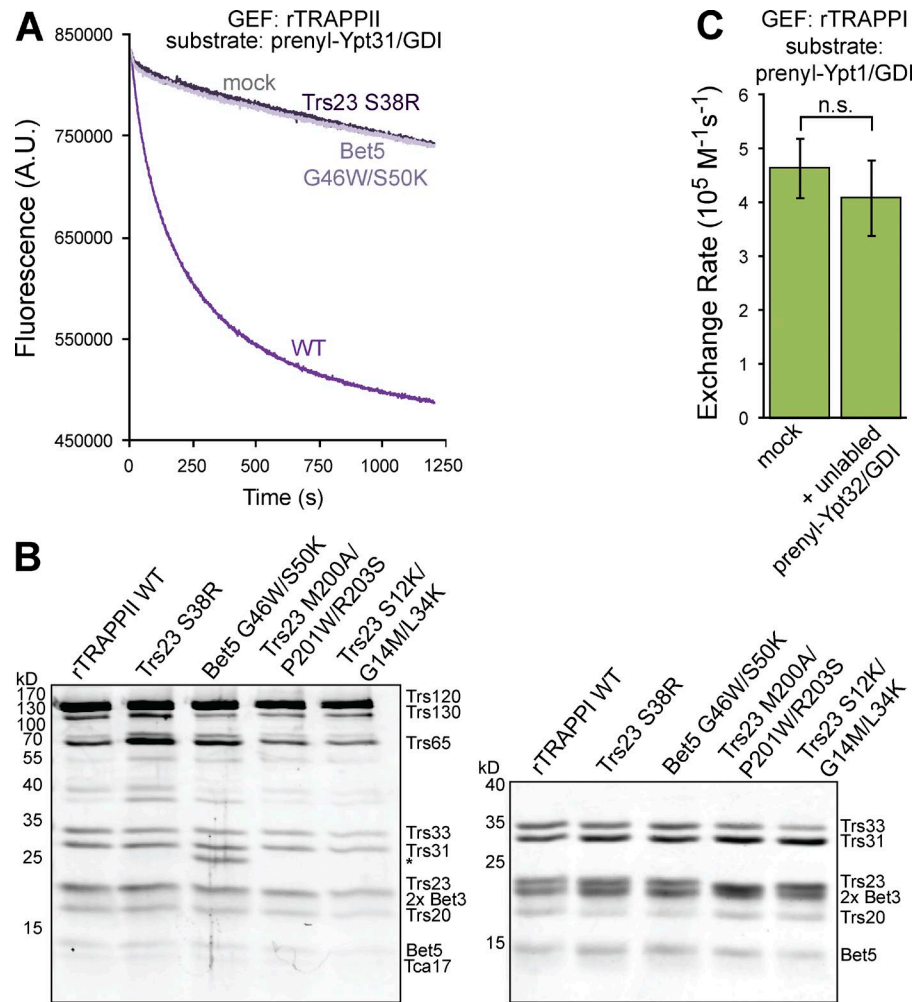

Figure S2. **Catalytic site mutants do not affect TRAPP complex assembly.** (A) Representative fluorescence traces showing a lack of activation of prenylated-Ypt31/GDI on TGN liposomes by the indicated rTRAPPII active site mutants. Ypt31 was not activated by the rTRAPPII mutants tested, and exponential functions could not be fit to experimental curves. Traces are representative of  $n \geq 3$  independent experiments. (B, left) rTRAPPII mutant complexes were purified via Trs130-TAP. Asterisk indicates contaminant. (right) rTRAPPI mutant complexes were purified via His<sub>6</sub>-Trs31. (C) rTRAPPI-mediated activation of mantGDP-labeled prenylated-Ypt1/GDI on TGN liposomes in the absence (mock) or presence of equimolar concentrations of competing unlabeled prenylated-Ypt32/GDI. Error bars represent 95% CIs for  $n = 3$  reactions. A.U., arbitrary units. n.s., not significant.

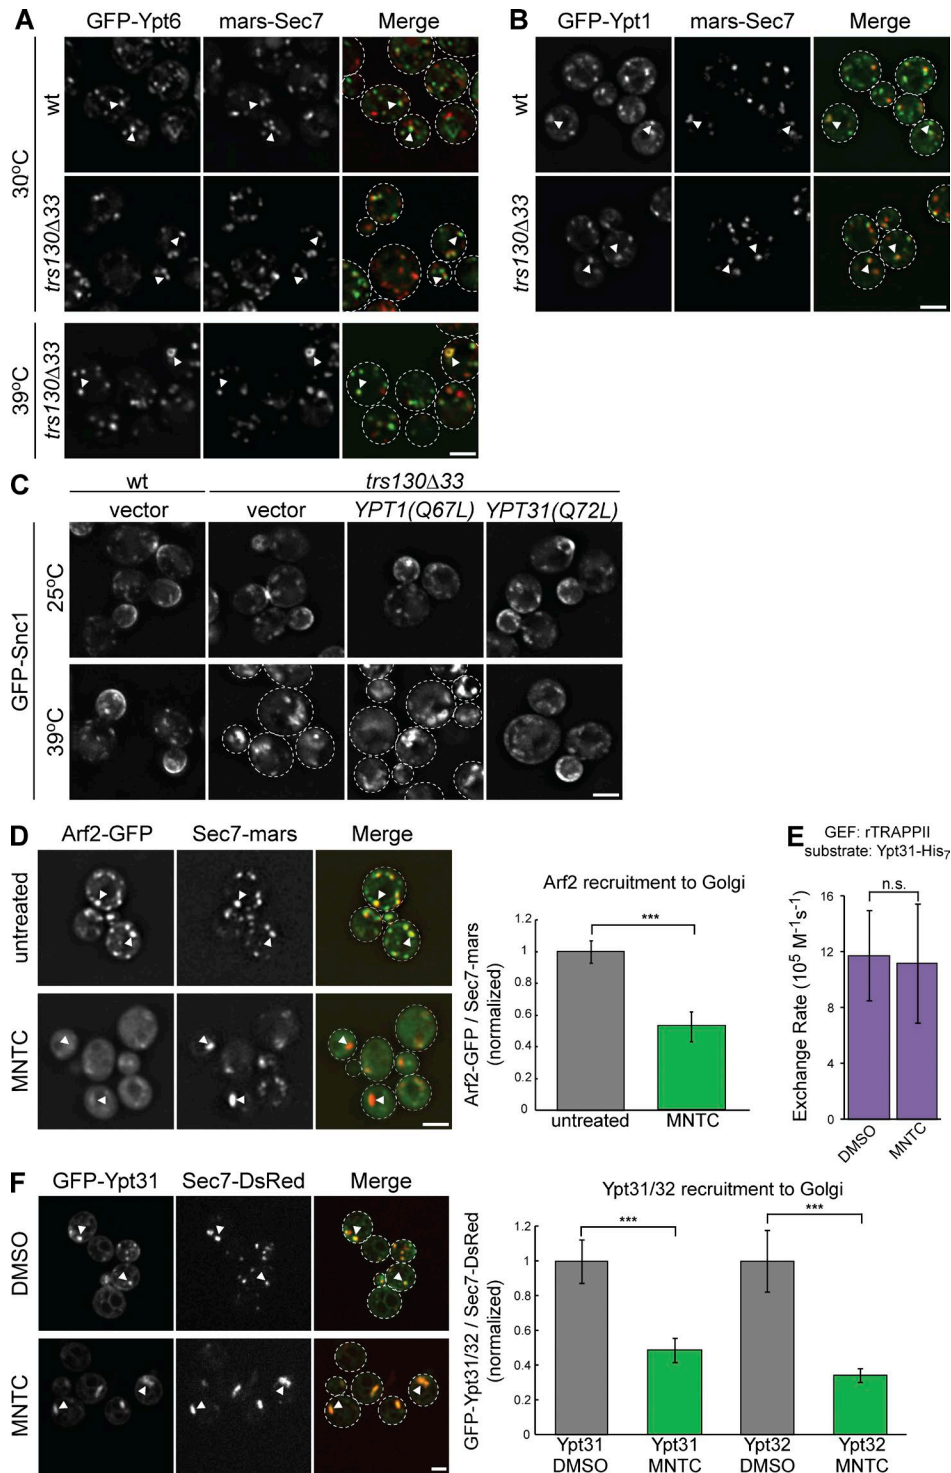

Figure S3. **Ypt31 overexpression restores trafficking in a TRAPP II mutant, and MNTC inhibits Arf1 activation and Ypt31/32 recruitment in vivo.** (A) Localization of plasmid-borne GFP-Ypt6 relative to mRFPmars-Sec7 in WT versus *trs130Δ33* yeast grown at the permissive temperature or after shifting to the restrictive temperature for 60 min. (B) Localization of plasmid-borne GFP-Ypt1 relative to the late Golgi marker mRFPmars-Sec7 in WT versus *trs130Δ33* yeast grown at the permissive temperature (30°C). (C) Localization of GFP-Snc1, a SNARE that cycles among the late Golgi, plasma membrane, and endocytic vesicles, in WT versus *trs130Δ33* yeast grown at the permissive temperature or after shifting to the restrictive temperature for 60 min. Constitutively active Ypt1(Q67L) and Ypt31(Q72L) were overexpressed on high-copy plasmids to test their ability to rescue Snc1 transport in the temperature-sensitive *trs130Δ33* yeast. (D, left) Localization of Arf2-GFP relative to Sec7-mRFPmars in cells treated with or without MNTC for 20 min. (right) Recruitment of Arf2 to Golgi compartments was measured by quantifying the ratio of Arf2-GFP to Sec7-mRFPmars in Sec7-mRFPmars puncta. Error bars represent 95% CIs for  $n = 66$  (untreated) or  $n = 21$  (MNTC-treated) Golgi compartments. (E) Rates of Ypt31-His<sub>7</sub> activation by rTRAPP II on TGN liposomes in the presence of DMSO (vehicle control) or MNTC. Error bars represent 95% CIs for  $n = 3$  reactions. (F, left) Localization of GFP-Ypt31 relative to Sec7-6xDsRed in cells treated with DMSO or MNTC for 10 min. (right) Recruitment of Ypt31/32 to Golgi compartments was measured as in A. Error bars represent 95% CIs for  $n \geq 40$  Golgi compartments. Bars, 2  $\mu\text{m}$ . White arrowheads denote colocalization of GFP-tagged GTPases with Sec7 at Golgi compartments. n.s., not significant; \*\*\*,  $P < 0.001$ .

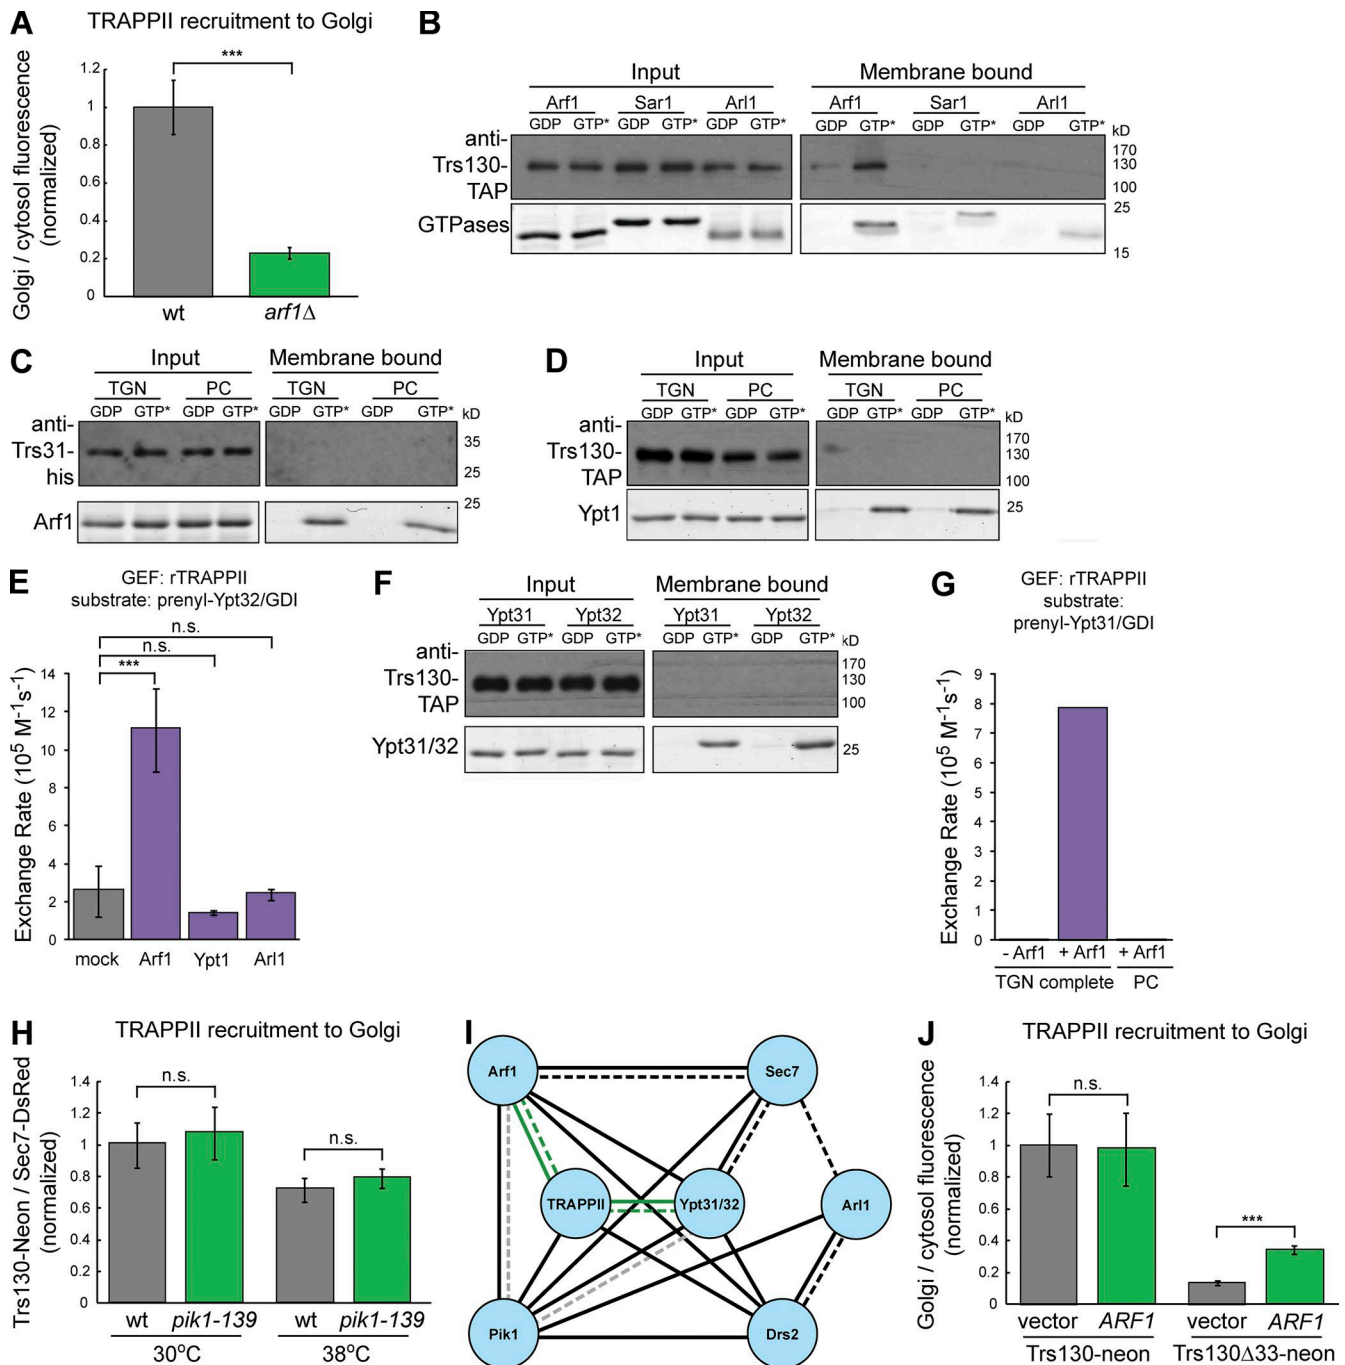

Figure S4. **TRAPP II membrane-recruitment controls.** (A) Line-trace quantification of cytosolic and Golgi localization of TRAPP II in WT versus *arf1*Δ yeast grown at 30°C. Error bars represent 95% CIs for  $n \geq 10$  cells. (B) Liposome flotation showing that activated myristoylated-Arf1, but not Sar1 or Arl1, recruits rTRAPP II to TGN liposomes. Liposomes do not contain  $\text{Ni}^{2+}$ -DOGS (See Materials and methods). (C) Liposome flotation showing that activated myristoylated-Arf1 does not recruit rTRAPP II to TGN or PC liposomes. Liposomes do not contain  $\text{Ni}^{2+}$ -DOGS. (D) Liposome flotation showing that activated prenylated-Ypt1 does not recruit rTRAPP II to TGN or PC liposomes. Liposomes do not contain  $\text{Ni}^{2+}$ -DOGS. (E) Rates of rTRAPP II-catalyzed prenylated-Ypt32/GDI activation on TGN liposomes in the absence (mock) or presence of activated myristoylated-Arf1, prenylated-Ypt1, or myristoylated-Arl1. Liposomes do not contain  $\text{Ni}^{2+}$ -DOGS. Error bars represent 95% CIs for  $n \geq 2$  reactions. (F) Liposome flotation showing that activated prenylated-Ypt31/32 does not recruit rTRAPP II to TGN liposomes. Liposomes do not contain  $\text{Ni}^{2+}$ -DOGS. (G) Rates of rTRAPP II-catalyzed prenylated-Ypt31/GDI activation on TGN or PC liposomes in the presence and absence of activated myristoylated-Arf1. Liposomes do not contain  $\text{Ni}^{2+}$ -DOGS. Rates are representative of  $n > 5$  independent experiments. (H) Recruitment of TRAPP II to Golgi compartments in WT versus *pik1-139* temperature-sensitive cells at the permissive temperature or after shifting the restrictive temperature for 60 min. Recruitment was measured by quantifying the ratio of Trs130-mNeonGreen to Sec7-6xDsRed in Sec7-6xDsRed puncta. Error bars represent 95% CIs for  $n \geq 43$  compartments. (I) Genetic (synthetic sick or lethal) and physical interactions among trafficking regulators at the late Golgi. Genetic and physical interactions are denoted by continuous and dashed lines, respectively. Interactions identified or reproduced in this study are indicated in green. Interactions reported in mammalian cells are represented in gray. (J) Line-trace quantification of cytosolic and Golgi localization of Trs130-mNeonGreen versus Trs130Δ33-mNeonGreen in WT cells with or without overexpression of Arf1. Error bars represent 95% CIs of  $n \geq 10$  cells. GTP\*, GMP-PNP. n.s., not significant; \*\*\*,  $P < 0.001$ .

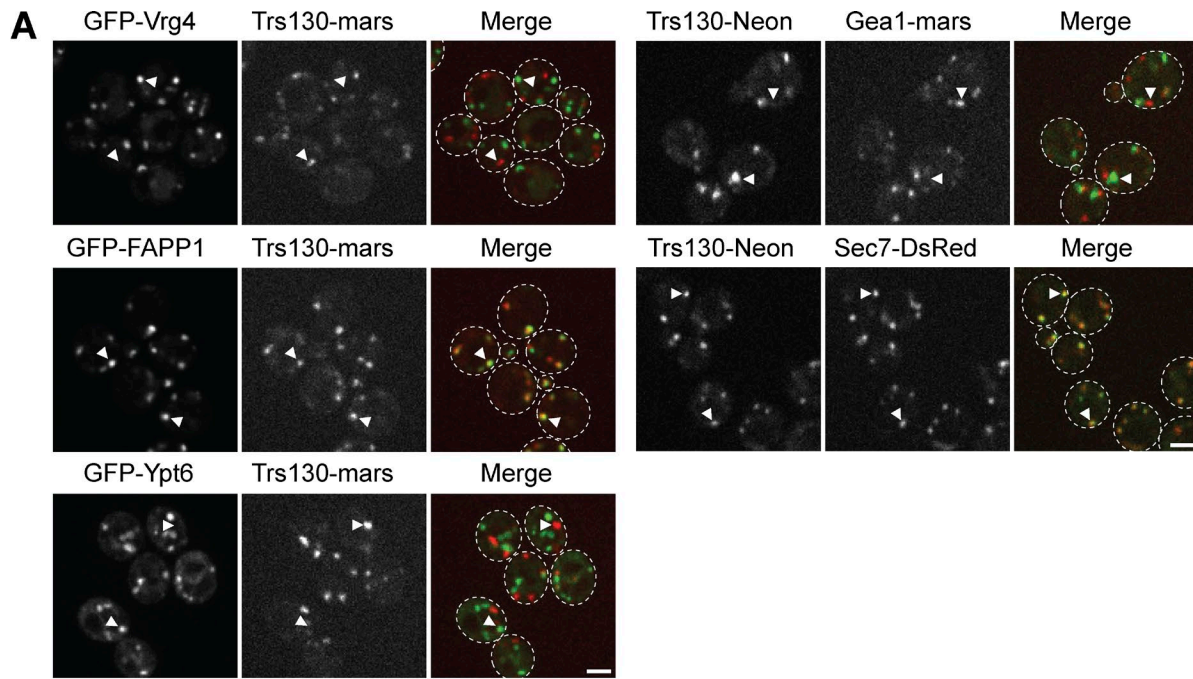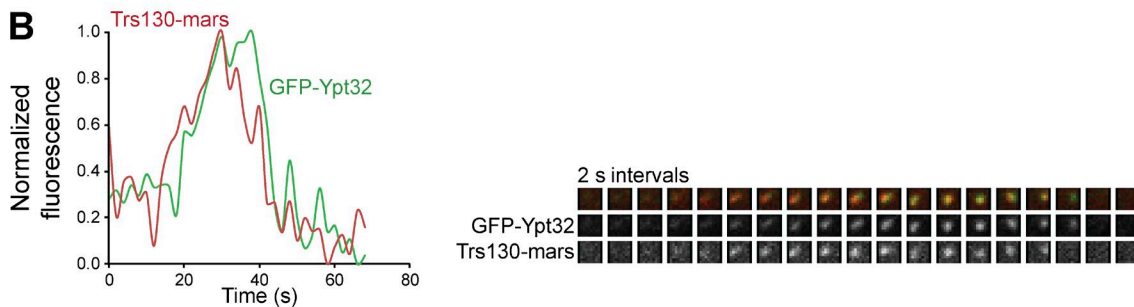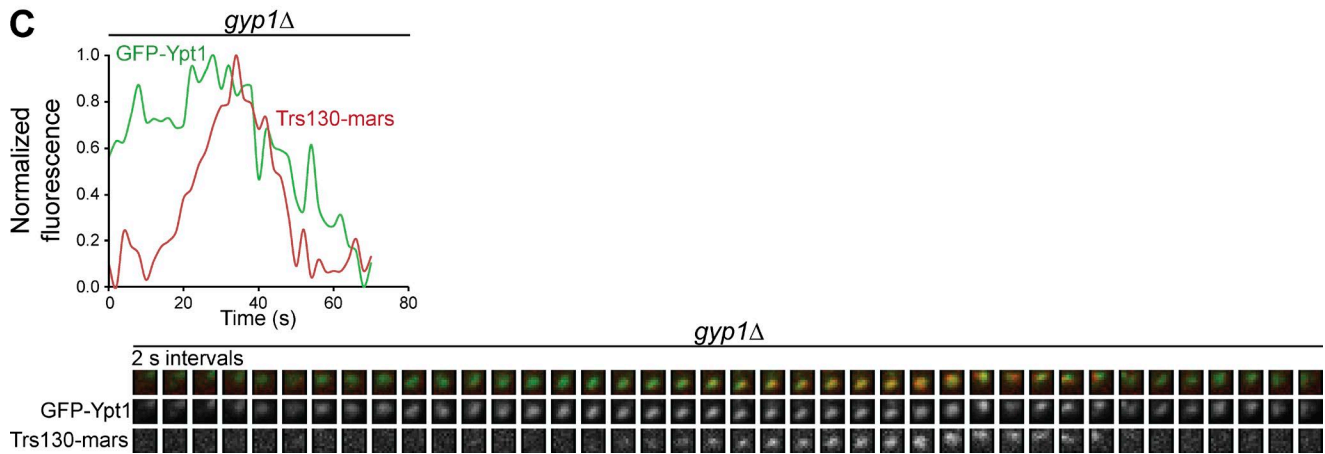

Figure S5. **TRAPPII does not localize to the early Golgi but overlaps with Ypt1 in *gyp1Δ* cells.** (A, left) Localization of Trs130-3xmRFPmars relative to the early Golgi marker GFP-Vrg4, GFP-hFAPP1 PH domain, a coincidence detector of PI(4)P and Arf1, and plasmid-borne GFP-Ypt6. (right) Localization of Trs130-mNeonGreen relative to the Arf1-GEFs Gea1-3xmRFPmars (early Golgi) and Sec7-6xDsRed (late Golgi/TGN). Bars, 2  $\mu$ m. (B) Time-lapse imaging series (2-s intervals) and normalized quantification of GFP-Ypt32 and Trs130-3xmRFPmars at a single Golgi compartment. (C) Time-lapse imaging series (2-s intervals) and normalized quantification of GFP-Ypt1 and Trs130-3xmRFPmars at a single Golgi compartment in a *gyp1Δ* mutant. Regions of interest for time-lapse imaging series are  $0.7 \times 0.7 \mu$ m. White arrowheads denote colocalization, or not, of early and late Golgi markers with TRAPPII at Golgi compartments.

Table S1. Plasmids used in this study

| Name                   | Description                                                                       | Vector backbone | Source                                        |
|------------------------|-----------------------------------------------------------------------------------|-----------------|-----------------------------------------------|
| Ypt1-His <sub>7</sub>  | Ypt1 with C-terminal His <sub>7</sub> tag and cleavable N-terminal GST tag        | pGEX-6P         | McDonold and Fromme, 2014                     |
| Ypt32-His <sub>7</sub> | Ypt32 with C-terminal His <sub>7</sub> tag and cleavable N-terminal GST tag       | pGEX-6P         | A. Bretscher (Cornell University, Ithaca, NY) |
| pCM15                  | Ypt31 with C-terminal His <sub>7</sub> tag and cleavable N-terminal GST tag       | pGEX-6P         | McDonold and Fromme, 2014                     |
| pLT22                  | Vps21 with C-terminal His <sub>7</sub> tag and cleavable N-terminal GST tag       | pGEX-6P         | This study                                    |
| pLT23                  | Sec4 with C-terminal His <sub>7</sub> tag and cleavable N-terminal GST tag        | pGEX-6P         | This study                                    |
| pCM14                  | Ypt6 with C-terminal His <sub>7</sub> tag and cleavable N-terminal GST tag        | pGEX-6P         | McDonold and Fromme, 2014                     |
| pLT50                  | Full-length Ypt1 with cleavable N-terminal GST tag                                | pGEX-6P         | This study                                    |
| pLT81                  | Full-length Ypt32 with cleavable N-terminal GST tag                               | pGEX-6P         | This study                                    |
| pLT72                  | Full-length Ypt31 with cleavable N-terminal GST tag                               | pGEX-6P         | This study                                    |
| pLT82                  | Full-length Ypt6 with cleavable N-terminal GST tag                                | pGEX-6P         | This study                                    |
| pLT40                  | Gdi1 with cleavable N-terminal GST tag                                            | pGEX-6P         | This study                                    |
| pLT35                  | Mrs6 with cleavable N-terminal His <sub>6</sub> tag                               | pET28           | This study                                    |
| pLT41                  | Bet2 with cleavable N-terminal His <sub>6</sub> tag and Bet4                      | pCDF-Duet-1     | This study                                    |
| pLT14                  | rTRAPPI with Trs33, His <sub>6</sub> (TEV)Trs31, Trs23, Bet3, Trs20 and Bet5      | pCOLA-Duet-1    | This study                                    |
| pLT21                  | rTRAPPI plasmid with His <sub>6</sub> tag removed from Trs31                      | pCOLA-Duet-1    | This study                                    |
| pLT16                  | Trs120 with cleavable N-terminal His <sub>6</sub> tag and Tca17                   | pET-Duet-1      | This study                                    |
| pLT36                  | Trs130 with C-terminal TAP tag and Trs65                                          | pCDF-Duet-1     | This study                                    |
| pLT24                  | rTRAPPI with active site mutant Trs23 S38R                                        | pCOLA-Duet-1    | This study                                    |
| pLT25                  | rTRAPPI (no His <sub>6</sub> tag) with active site mutant Trs23 S38R              | pCOLA-Duet-1    | This study                                    |
| pLT27                  | rTRAPPI with active site mutant Bet5 G46W/S50K                                    | pCOLA-Duet-1    | This study                                    |
| pLT28                  | rTRAPPI (no His <sub>6</sub> tag) with active site mutant Bet5 G46W/S50K          | pCOLA-Duet-1    | This study                                    |
| pLT67                  | rTRAPPI with active site mutant Trs23 M200A/P201W/R203S                           | pCOLA-Duet-1    | This study                                    |
| pLT66                  | rTRAPPI (no His <sub>6</sub> tag) with active site mutant Trs23 M200A/P201W/R203S | pCOLA-Duet-1    | This study                                    |
| pLT64                  | rTRAPPI with active site mutant Trs23 S12K/G14M/L34K                              | pCOLA-Duet-1    | This study                                    |
| pLT61                  | rTRAPPI (no His <sub>6</sub> tag) with active site mutant Trs23 S12K/G14M/L34K    | pCOLA-Duet-1    | This study                                    |
| pNmt1                  | Nmt1                                                                              | pCYC            | Duronio et al., 1990                          |
| pArf1                  | Arf1                                                                              | pET3c           | Weiss et al., 1989                            |
| pCF1184                | Arl1                                                                              | pET23           | McDonold and Fromme, 2014                     |
| pRS425                 | Yeast 2- $\mu$ m vector with <i>LEU2</i> marker                                   | pRS425          | Sikorski and Hieter, 1989                     |
| pRS416                 | Yeast centromeric vector with <i>URA3</i> marker                                  | pRS416          | Sikorski and Hieter, 1989                     |
| pLT31                  | <i>YPT1</i> gene in pRS425                                                        | pRS425          | This study                                    |
| pLT32                  | <i>YPT1(Q67L)</i> GTP-locked mutant in pRS425                                     | pRS425          | This study                                    |
| VBS327                 | <i>YPT31</i> gene in pRS425                                                       | pRS425          | Sciorra et al., 2005                          |
| VBS333                 | <i>YPT31(Q72L)</i> GTP-locked mutant in pRS425                                    | pRS425          | Sciorra et al., 2005                          |
| pCF1022                | <i>ARF1</i> gene in pRS416                                                        | pRS416          | This study                                    |
| pLT86                  | <i>ARF1(Q71L)</i> GTP-locked mutant in pRS416                                     | pRS416          | This study                                    |
| pLT45                  | mRFPmars-Sec7 in pRS415                                                           | pRS415          | This study                                    |
| pLT44                  | mRFPmars-Sec7 in pRS416                                                           | pRS416          | This study                                    |
| pRC2100                | GFP-Ypt1 in pRS415                                                                | pRS415          | Buvelot Frei et al., 2006                     |
| pRC650                 | GFP-Ypt6 in pRS415                                                                | pRS415          | Buvelot Frei et al., 2006                     |
| pRC678                 | GFP-Ypt31 integration plasmid                                                     | pRS306          | Buvelot Frei et al., 2006                     |
| pRC679                 | GFP-Ypt32 integration plasmid                                                     | pRS306          | Buvelot Frei et al., 2006                     |
| APB2661                | GFP-Snc1 integration plasmid                                                      | pRS306          | Lewis et al., 2000                            |
| Sec7-6xDsRed           | Sec7-6xDsRed integration plasmid                                                  | pRS406          | Losev et al., 2006                            |
| iGFP-Vrg4              | iGFP-Vrg4 integration plasmid                                                     | Ylplac211       | B. Glick (University of Chicago, Chicago, IL) |
| GFP-FAPP1              | GFP-hFAPP1 PH domain integration plasmid                                          | pRS406          | Levine and Munro, 2002                        |

Table S2. Yeast strains used in this study

| Name            | Description                                                                                                                                             | Source                    |
|-----------------|---------------------------------------------------------------------------------------------------------------------------------------------------------|---------------------------|
| SEY6210         | <i>MAT<math>\alpha</math> ura3-52 his3-<math>\Delta</math>200 leu2-3,112 lys2-801 trp1-<math>\Delta</math>901 suc2-<math>\Delta</math>9</i>             | Robinson et al., 1988     |
| SEY6210.1       | <i>MAT<math>\alpha</math> ura3-52 his3-<math>\Delta</math>200 leu2-3,112 lys2-801 trp1-<math>\Delta</math>901 suc2-<math>\Delta</math>9</i>             | Robinson et al., 1988     |
| BY4741 $\alpha$ | <i>MAT<math>\alpha</math> ura3-<math>\Delta</math>0 his3-<math>\Delta</math>1 leu2-<math>\Delta</math>0 lys2-<math>\Delta</math>0</i>                   | Brachmann et al., 1998    |
| RSY298          | <i>MAT<math>\alpha</math> trp1-1 his3-11,15 leu2-3,112 can1-100 ura3-1 ade2-1 sec7-1</i>                                                                | Esmon et al., 1981        |
| CFY1205         | SEY6210 <i>Arf2-GFP::HIS3 Sec7-mRFPmars::TRP1</i>                                                                                                       | This study                |
| CFY1805         | SEY6210 <i>GFP-Ypt31::URA3 Sec7-6xDsRed::URA3::ura3</i>                                                                                                 | McDonold and Fromme, 2014 |
| CFY1806         | SEY6210 <i>ura3::GFP-Ypt32::URA3 Sec7-6xDsRed::URA3::ura3</i>                                                                                           | McDonold and Fromme, 2014 |
| CFY1903         | <i>MAT<math>\alpha</math> his3-<math>\Delta</math>1 leu2-<math>\Delta</math>0 met15-<math>\Delta</math>0 ura3-<math>\Delta</math>0 Trs120-TAP::HIS3</i> | GE Healthcare             |
| CFY2156         | SEY6210.1 <i>trs130<math>\Delta</math>33::KanMX</i>                                                                                                     | This study                |
| CFY2223         | SEY6210.1 <i>GFP-Snc1::URA3</i>                                                                                                                         | This study                |
| CFY2225         | SEY6210.1 <i>trs130<math>\Delta</math>33::KanMX GFP-Snc1::URA3</i>                                                                                      | This study                |
| CFY2297         | SEY6210.1 <i>GFP-Ypt31::URA3</i>                                                                                                                        | This study                |
| CFY2299         | SEY6210.1 <i>GFP-Ypt31::URA3 trs130<math>\Delta</math>33::KanMX</i>                                                                                     | This study                |
| CFY2301         | SEY6210.1 <i>GFP-Ypt32::URA3</i>                                                                                                                        | This study                |
| CFY2303         | SEY6210.1 <i>GFP-Ypt32::URA3 trs130<math>\Delta</math>33::KanMX</i>                                                                                     | This study                |
| CFY2451         | SEY6210.1 <i>Trs130-mNeonGreen::HIS3</i>                                                                                                                | This study                |
| CFY2454         | SEY6210.1 <i>Trs130<math>\Delta</math>33-mNeonGreen::HIS3</i>                                                                                           | This study                |
| CFY2545         | SEY6210.1 <i>Trs130-mNeonGreen::HIS3 arf1<math>\Delta</math>::KanMX</i>                                                                                 | This study                |
| CFY2546         | RSY298 <i>Trs130-mNeonGreen::HIS3</i>                                                                                                                   | This study                |
| CFY2562         | SEY6210 <i>Trs130-mNeonGreen-HA::TRP1 pik1<math>\Delta</math>::HIS3 pik1-139 (plasmid)</i>                                                              | This study                |
| CFY2603         | SEY6210.1 <i>Trs130-3xmRFPmars::TRP1</i>                                                                                                                | This study                |
| CFY2604         | SEY6210.1 <i>Trs130-3xmRFPmars::TRP1 GFP-Vrg4</i>                                                                                                       | This study                |
| CFY2630         | SEY6210.1 <i>Trs130-mNeonGreen::HIS3 Gea1-3xmRFPmars::TRP1</i>                                                                                          | This study                |
| CFY2698         | SEY6210 <i>Trs130-mNeonGreen::HIS3 Sec7-6xDsRed::URA3</i>                                                                                               | This study                |
| CFY2701         | SEY6210 <i>Trs130-mNeonGreen::HIS3 Sec7-mRFPmars::TRP1 erg6<math>\Delta</math>::KanMX</i>                                                               | This study                |
| CFY2710         | SEY6210.1 <i>Trs130-3xmRFPmars::TRP1 GFP-hFAPP1 PH domain::URA3</i>                                                                                     | This study                |
| CFY2743         | BY4741 $\alpha$ <i>Trs130-mNeonGreen::HIS3</i>                                                                                                          | This study                |
| CFY2745         | BY4741 $\alpha$ <i>Trs130-mNeonGreen::HIS3 drs2<math>\Delta</math>::KanMX</i>                                                                           | This study                |
| CFY2801         | SEY6210.1 <i>Trs130-3xmRFPmars::TRP1 GFP-Ypt31::URA3</i>                                                                                                | This study                |
| CFY2803         | SEY6210.1 <i>Trs130-3xmRFPmars::TRP1 GFP-Ypt32::URA3</i>                                                                                                | This study                |
| CFY2818         | SEY6210 <i>GFP-Ypt31::URA3 Sec7-mRFPmars::TRP1 erg6<math>\Delta</math>::KanMX</i>                                                                       | This study                |
| CFY2821         | SEY6210.1 <i>Trs130-3xmRFPmars::TRP1 gyp1<math>\Delta</math>::KanMX</i>                                                                                 | This study                |

Table S3. Liposome formulations used in this study.

| Lipid          | TGN complete | TGN anionic | TGN neutral | PC |
|----------------|--------------|-------------|-------------|----|
|                | %            | %           | %           | %  |
| DOPC           | 24           | 57          | 60          | 99 |
| POPC           | 6            | 6           | 6           | -  |
| DOPE           | 7            | -           | 7           | -  |
| POPE           | 3            | -           | 3           | -  |
| DOPS           | 1            | 1           | -           | -  |
| POPS           | 2            | 2           | -           | -  |
| DOPA           | 1            | 1           | -           | -  |
| POPA           | 2            | 2           | -           | -  |
| PI             | 29           | 29          | -           | -  |
| PI(4)P         | 1            | 1           | -           | -  |
| CDP-DAG        | 2            | -           | 2           | -  |
| DO-DAG         | 2            | -           | 2           | -  |
| PO-DAG         | 4            | -           | 4           | -  |
| Ceramide (C18) | 5            | -           | 5           | -  |
| Cholesterol    | 10           | -           | 10          | -  |
| DiR dye        | 1            | 1           | 1           | 1  |

-, NA; CDP-DAG, 1,2-dipalmitoyl-sn-glycero-3-cytidine diphosphate; DiR, near-infrared dye; DO-DAG, 1,2-dioleoyl-sn-glycerol; DOPA, 1,2-dioleoyl-sn-glycero-3-phosphate; DOPC, 1,2-dioleoyl-sn-glycero-3-phosphocholine; DOPE, 1,2-dioleoyl-sn-glycero-3-phosphoethanolamine; DOPS, 1,2-dioleoyl-sn-glycero-3-phospho-L-serine; PO-DAG, 1-palmitoyl-2-oleoyl-sn-glycerol; POPA, 1-palmitoyl-2-oleoyl-sn-glycero-3-phosphate; POPC, 1-palmitoyl-2-oleoyl-sn-glycero-3-phosphocholine; POPE, 1-palmitoyl-2-oleoyl-sn-glycero-3-phosphoethanolamine; POPS, 1-palmitoyl-2-oleoyl-sn-glycero-3-phospho-L-serine.

## References

- Brachmann, C.B., A. Davies, G.J. Cost, E. Caputo, J. Li, P. Hieter, and J.D. Boeke. 1998. Designer deletion strains derived from *Saccharomyces cerevisiae* S288C: a useful set of strains and plasmids for PCR-mediated gene disruption and other applications. *Yeast*. 14:115–132. [http://dx.doi.org/10.1002/\(SICI\)1097-0061\(19980130\)14:2<115::AID-YEA204>3.0.CO;2-2](http://dx.doi.org/10.1002/(SICI)1097-0061(19980130)14:2<115::AID-YEA204>3.0.CO;2-2)
- Buvelot Frei, S., P.B. Rahl, M. Nussbaum, B.J. Briggs, M. Calero, S. Janeczko, A.D. Regan, C.Z. Chen, Y. Barral, G.R. Whittaker, and R.N. Collins. 2006. Bioinformatic and comparative localization of Rab proteins reveals functional insights into the uncharacterized GTPases Ypt10p and Ypt11p. *Mol. Cell. Biol.* 26:7299–7317. <http://dx.doi.org/10.1128/MCB.02405-05>
- Duronio, R.J., E. Jackson-Machelski, R.O. Heuckeroth, P.O. Olins, C.S. Devine, W. Yonemoto, L.W. Slice, S.S. Taylor, and J.I. Gordon. 1990. Protein N-myristoylation in *Escherichia coli*: Reconstitution of a eukaryotic protein modification in bacteria. *Proc. Natl. Acad. Sci. USA*. 87:1506–1510. <http://dx.doi.org/10.1073/pnas.87.4.1506>
- Esmon, B., P. Novick, and R. Schekman. 1981. Compartmentalized assembly of oligosaccharides on exported glycoproteins in yeast. *Cell*. 25:451–460. [http://dx.doi.org/10.1016/0092-8674\(81\)90063-5](http://dx.doi.org/10.1016/0092-8674(81)90063-5)
- Goody, R.S., A. Rak, and K. Alexandrov. 2005. The structural and mechanistic basis for recycling of Rab proteins between membrane compartments. *Cell. Mol. Life Sci.* 62:1657–1670. <http://dx.doi.org/10.1007/s00018-005-4486-8>
- Levine, T.P., and S. Munro. 2002. Targeting of Golgi-specific pleckstrin homology domains involves both PtdIns 4-kinase-dependent and -independent components. *Curr. Biol.* 12:695–704. [http://dx.doi.org/10.1016/S0960-9822\(02\)00779-0](http://dx.doi.org/10.1016/S0960-9822(02)00779-0)
- Lewis, M.J., B.J. Nichols, C. Prescianotto-Baschong, H. Riezman, and H.R. Pelham. 2000. Specific retrieval of the exocytic SNARE Snc1p from early yeast endosomes. *Mol. Biol. Cell.* 11:23–38. <http://dx.doi.org/10.1091/mbc.11.1.23>
- Losev, E., C.A. Reinke, J. Jellen, D.E. Strongin, B.J. Bevis, and B.S. Glick. 2006. Golgi maturation visualized in living yeast. *Nature*. 441:1002–1006. <http://dx.doi.org/10.1038/nature04717>
- McDonold, C.M., and J.C. Fromme. 2014. Four GTPases differentially regulate the Sec7 Arf-GEF to direct traffic at the trans-golgi network. *Dev. Cell.* 30:759–767. <http://dx.doi.org/10.1016/j.devcel.2014.07.016>
- Robinson, J.S., D.J. Klionsky, L.M. Banta, and S.D. Emr. 1988. Protein sorting in *Saccharomyces cerevisiae*: Isolation of mutants defective in the delivery and processing of multiple vacuolar hydrolases. *Mol. Cell. Biol.* 8:4936–4948. <http://dx.doi.org/10.1128/MCB.8.11.4936>
- Sciorra, V.A., A. Audhya, A.B. Parsons, N. Segev, C. Boone, and S.D. Emr. 2005. Synthetic genetic array analysis of the PtdIns 4-kinase Pik1p identifies components in a Golgi-specific Ypt31/rab-GTPase signaling pathway. *Mol. Biol. Cell.* 16:776–793. <http://dx.doi.org/10.1091/mbc.E04-08-0700>
- Sikorski, R.S., and P. Hieter. 1989. A system of shuttle vectors and yeast host strains designed for efficient manipulation of DNA in *Saccharomyces cerevisiae*. *Genetics*. 122:19–27.
- Weiss, O., J. Holden, C. Rulka, and R.A. Kahn. 1989. Nucleotide binding and cofactor activities of purified bovine brain and bacterially expressed ADP-ribosylation factor. *J. Biol. Chem.* 264:21066–21072.
